# Supplementary material for: Identification and characterization of a novel casein anticoagulant peptide derived from in vivo digestion
Source: Royal Society of Chemistry journal article supplement (doi:10.1039/c8fo02546k), 2019-01-01

## Supplementary

### Figure Captions

**Figure S1**-Chemical identification of the synthesized peptide AVPYYPQR. (A)The purity of the peptide AVPYYPQR was identified by HPLC. Retention time (RT) is at 16.485 min. (B) Mass spectrogram of the peptide AVPYYPQR was assayed by LC-MS/MS.

Figure S1

(A)

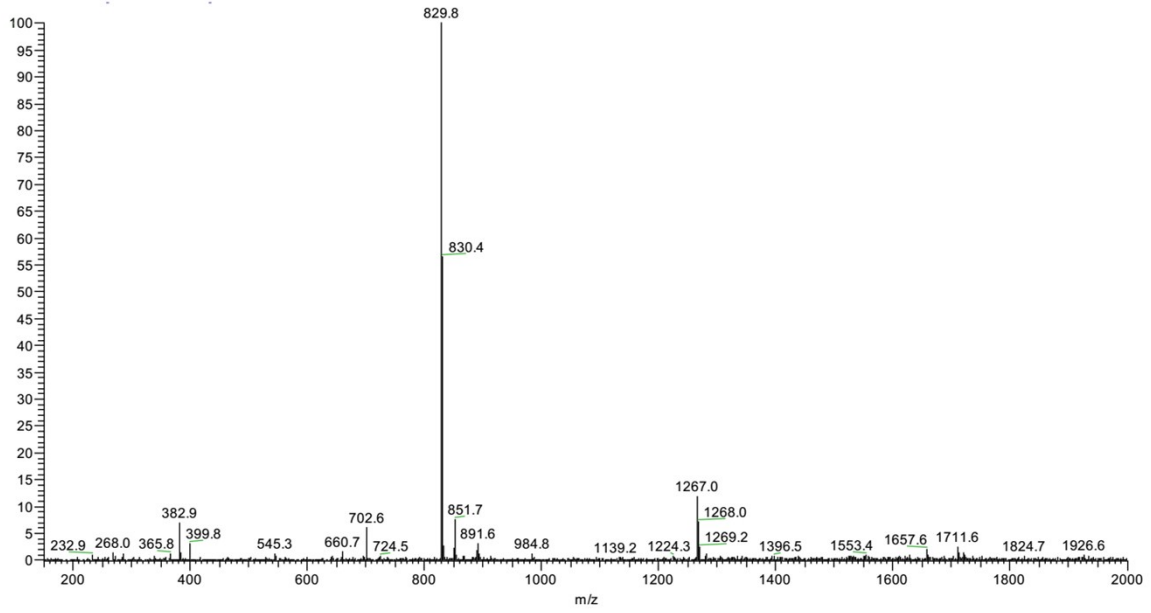

(B)

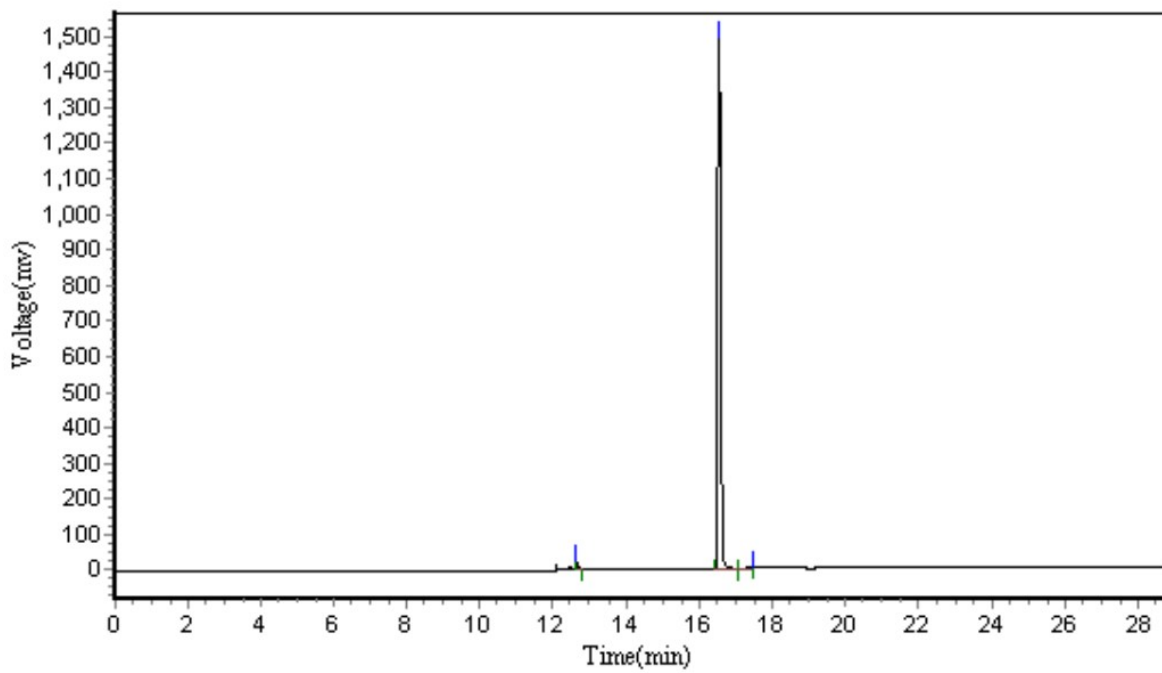

Supplement: c8fo02546k1.pdf [file c8fo02546k1.pdf]
